# Supplementary material
Source: publisher figshare collection journal article supplement (https://frontiersin.figshare.com/ndownloader/files/35143744)
Supplement: Supplementary file [file 35143744]

# Supplementary Material

## 1 SUPPLEMENTARY DATA

### 1.1 Figures

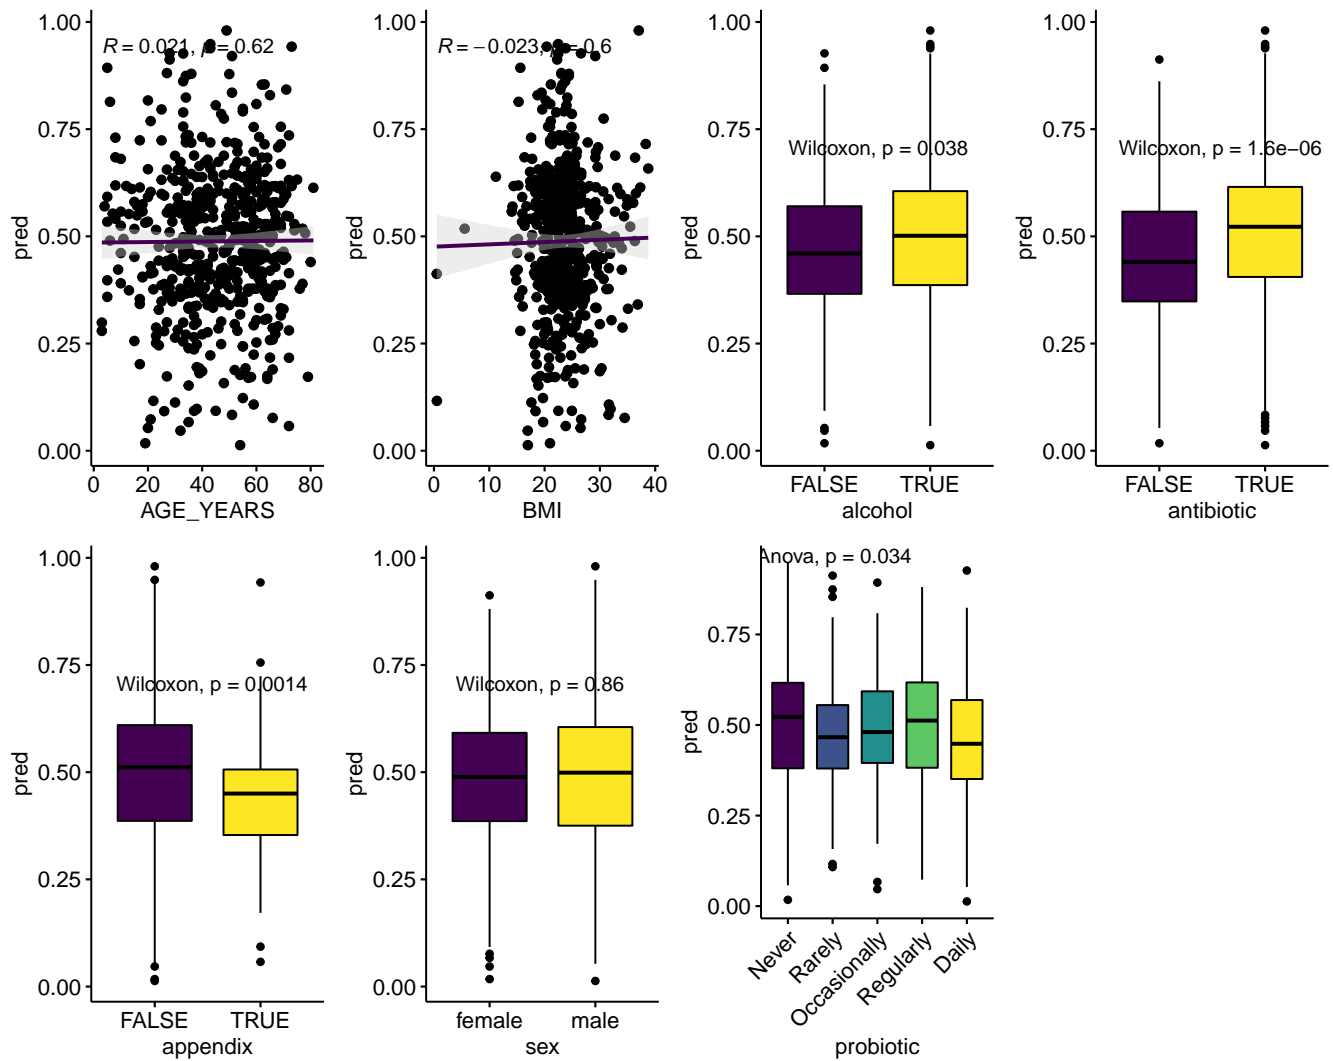

**Figure S1.** Cofounder analysis in train set.

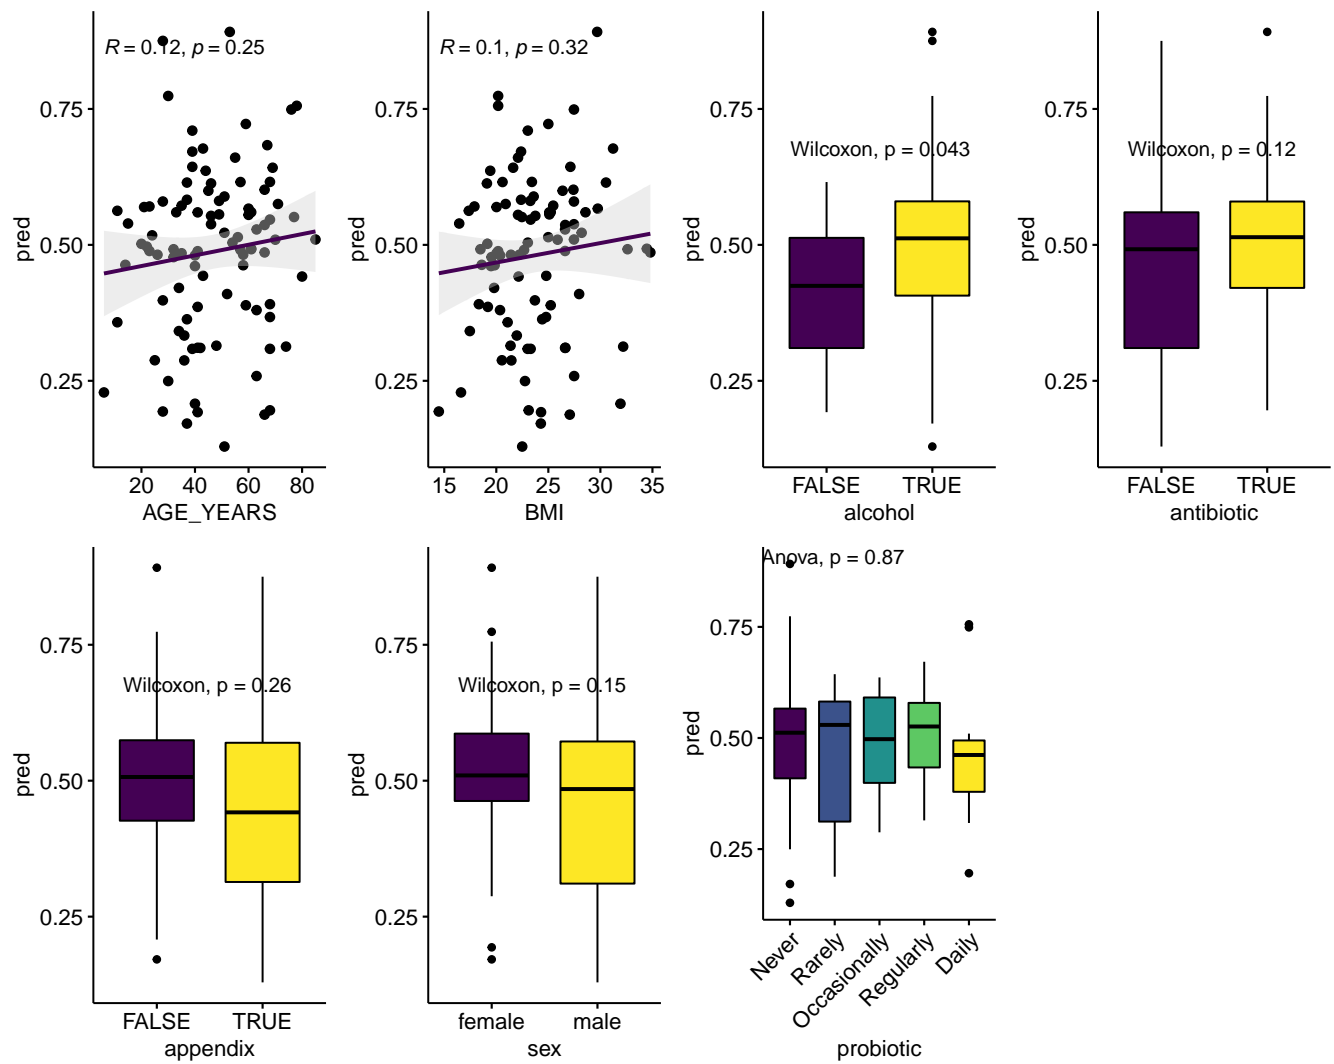

**Figure S2.** Confounder analysis in test set.
